# Supplementary material for: eHealth Trends in Europe 2005-2007: A Population-Based Survey
Source: PubMed Central journal article supplement (PMC2629359; doi:10.2196/jmir.1023), 2008-11-17
Supplement: jmir_v10i4e42_app1.pdf [file jmir_v10i4e42_app1.pdf]

**Multimedia Appendix 1.** Internet users and Internet health users in the seven European countries—trends 2005 and 2007

|                                                                        | Pop. Weight | 2005/2007 | Internet users   |                  |                  | Internet health users |                  |                 |
|------------------------------------------------------------------------|-------------|-----------|------------------|------------------|------------------|-----------------------|------------------|-----------------|
|                                                                        |             |           | 2005             | 2007             | Growth           | 2005                  | 2007             | Growth          |
| Country                                                                |             | Count (N) | % (CI)           | % (CI)           | % (CI)           | % (CI)                | % (CI)           | % (CI)          |
| Denmark                                                                | 3,5         | 960/1021  | 81.4 (79.3-83.5) | 87.1 (85.3-88.8) | 5.7 (2.9-8.4)    | 61.8 (59.0-64.7)      | 71.6 (69.1-74.1) | 9.8 (6.0-13.6)  |
| Germany                                                                | 53,4        | 974/1000  | 63.3 (60.6-66.0) | 64.9 (62.4-67.4) | 1.6 (-2.0-5.3)   | 44.4 (41.4-47.5)      | 56.6 (53.9-59.3) | 12.2 (8.1-16.2) |
| Greece                                                                 | 7,2         | 1000/1000 | 42.3 (39.7-45.0) | 47.2 (44.7-49.7) | 4.9 (1.2-8.5)    | 23.2 (20.7-25.7)      | 32.1 (29.5-34.7) | 8.9 (5.3-12.5)  |
| Latvia                                                                 | 1,5         | 1000/1000 | 53.8 (51.4-56.2) | 66.7 (64.5-68.9) | 12.9 (9.6-16.1)  | 35.7 (33.2-38.2)      | 47.0 (44.4-49.6) | 11.3 (7.7-14.9) |
| Norway                                                                 | 3,0         | 972/1001  | 81.3 (79.3-83.2) | 87.9 (86.2-89.6) | 6.6 (4.1-9.2)    | 60.3 (57.4-63.1)      | 66.8 (64.2-69.5) | 6.6 (2.7-10.4)  |
| Poland                                                                 | 24,7        | 1027/1000 | 52.8 (50.3-55.4) | 66.7 (64.3-69.1) | 13.9 (10.4-17.4) | 41.5 (38.8-44.2)      | 53.3 (50.6-56.0) | 11.8 (8.0-15.6) |
| Portugal                                                               | 6,8         | 2001/1000 | 49.0 (47.4-50.6) | 52.3 (49.8-54.8) | 3.3 (0.3-6.3)    | 29.2 (27.4-31.1)      | 38.3 (35.6-41.0) | 9.1 (5.8-12.3)  |
| <b>Average</b>                                                         |             |           | 60.6 (59.7-61.4) | 67.5 (66.7-68.4) | 7.0 (5.7-8.2)    | 42.3 (41.3-43.3)      | 52.2 (51.3-53.2) | 9.9 (8.5-11.3)  |
| <b>Average (weighted for population size) (See note under Methods)</b> |             |           | 59.3 (57.7-60.8) | 64.7 (63.2-66.2) | 5.4 (3.3-7.6)    | 42.1 (40.3-43.9)      | 53.5 (51.9-55.1) | 11.4 (9.0-13.7) |
