# Supplementary material for: eHealth Trends in Europe 2005-2007: A Population-Based Survey
Source: PubMed Central journal article supplement (PMC2629359; doi:10.2196/jmir.1023), 2008-11-17
Supplement: jmir_v10i4e42_app2.pdf [file jmir_v10i4e42_app2.pdf]

**Multimedia Appendix 2.** Internet users by age and gender

|              | 2005                    |                         |                         | 2007                         |                                |                         |
|--------------|-------------------------|-------------------------|-------------------------|------------------------------|--------------------------------|-------------------------|
|              | Men<br>% (CI)           | Women<br>% (CI)         | Diff (CI)               | Men<br>Frequency/N<br>% (CI) | Women<br>Frequency/N<br>% (CI) | Diff (CI)               |
| <b>15-25</b> | 94.5 (93.4-95.6)        | 91.5 (90.4-92.7)        | 3.0 (1.4-4.6)           | 659/696<br>95.3 (94.3-96.4)  | 544/575<br>94.3 (93.3-95.2)    | 1.0 (-0.4-2.4)          |
| <b>26-35</b> | 84.6 (83.0-86.2)        | 73.5 (71.7-75.2)        | 11.1 (8.8-13.5)         | 524/598<br>88.8 (87.5-90.2)  | 450/557<br>81.8 (80.3-83.4)    | 7.0 (4.9-9.0)           |
| <b>36-45</b> | 75.5 (73.6-77.4)        | 64.3 (62.3-66.3)        | 11.1 (8.4-13.9)         | 526/631<br>82.8 (81.1-84.6)  | 510/679<br>75.2 (73.4-77.0)    | 7.6 (5.1-10.1)          |
| <b>46-55</b> | 62.8 (60.8-64.8)        | 53.2 (51.2-55.2)        | 9.6 (6.7-12.4)          | 388/533<br>71.8 (69.8-73.7)  | 372/611<br>60.7 (58.7-62.6)    | 11.1 (8.4-13.8)         |
| <b>56-65</b> | 43.9 (41.7-46.0)        | 31.1 (29.0-33.1)        | 12.8 (9.9-15.7)         | 287/488<br>55.5 (53.4-57.6)  | 245/613<br>38.5 (36.5-40.6)    | 17.0 (14.0-19.9)        |
| <b>66-80</b> | 20.5 (18.7-22.3)        | 10.3 (9.0-11.6)         | 10.2 (8.0-12.4)         | 150/446<br>34.1 (32.1-36.0)  | 92/595<br>16.6 (15.0-18.2)     | 17.4 (15.0-19.9)        |
| <b>All</b>   | <b>67.8 (66.6-69.1)</b> | <b>53.8 (52.6-55.0)</b> | <b>14.1 (12.3-15.8)</b> | <b>74.6 (73.3-75.8)</b>      | <b>61.0 (59.9-62.1)</b>        | <b>13.6 (11.9-15.2)</b> |
