# Supplementary material for: eHealth Trends in Europe 2005-2007: A Population-Based Survey
Source: PubMed Central journal article supplement (PMC2629359; doi:10.2196/jmir.1023), 2008-11-17
Supplement: jmir_v10i4e42_app3.pdf [file jmir_v10i4e42_app3.pdf]

**Multimedia Appendix 3.** Internet health users by age and gender

|              | 2005                    |                         |                      | 2007                         |                                |                      |
|--------------|-------------------------|-------------------------|----------------------|------------------------------|--------------------------------|----------------------|
|              | Men<br>% (CI)           | Women<br>% (CI)         | Diff (CI)            | Men<br>Frequency/N<br>% (CI) | Women<br>Frequency/N<br>% (CI) | Diff (CI)            |
| <b>15-25</b> | 60.7 (58.3-63.1)        | 68.4 (66.4-70.3)        | -7.6 (-10.7- -4.6)   | 496/696<br>72.4 (70.1-74.6)  | 483/575<br>83.5 (81.8-85.2)    | -11.1 (-13.9- -8.3)  |
| <b>26-35</b> | 58.2 (56.0-60.4)        | 58.8 (56.8-60.7)        | -0.5 (-3.5- 2.4)     | 392/598<br>67.6 (65.4-69.7)  | 393/557<br>71.8 (70.0-73.6)    | -4.3 (-7.1- -1.5)    |
| <b>36-45</b> | 50.6 (48.2-53.0)        | 49.4 (47.2-51.5)        | 1.2 (-2.0- 4.4)      | 392/631<br>60.8 (58.5-63.1)  | 427/679<br>62.8 (60.7-64.8)    | -2.0 (-5.0- 1.1)     |
| <b>46-55</b> | 38.7 (36.6-40.8)        | 39.6 (37.6-41.7)        | -1.0 (-3.9- 2.0)     | 284/533<br>52.3 (50.2-54.5)  | 290/611<br>47.3 (45.3-49.4)    | 5.0 (2.0-7.9)        |
| <b>56-65</b> | 27.5 (25.4-29.5)        | 19.3 (17.5-21.2)        | 8.2 (5.4- 10.9)      | 190/488<br>36.4 (34.2-38.6)  | 170/613<br>26.6 (24.6-28.6)    | 9.9 (6.9-12.8)       |
| <b>66-80</b> | 12.3 (10.8-13.8)        | 7.4 (6.2-8.5)           | 4.9 (3.0- 6.9)       | 101/446<br>22.6 (20.8-24.5)  | 55/595<br>9.9 (8.6-11.2)       | 12.8 (10.5-15.0)     |
| <b>All</b>   | <b>44.2 (42.7-45.8)</b> | <b>40.5 (39.2-41.7)</b> | <b>3.8 (1.8-5.8)</b> | <b>54.5 (52.9-56.0)</b>      | <b>50.1(48.9-51.4)</b>         | <b>4.4 (2.4-6.4)</b> |
