# Supplementary material for: eHealth Trends in Europe 2005-2007: A Population-Based Survey
Source: PubMed Central journal article supplement (PMC2629359; doi:10.2196/jmir.1023), 2008-11-17
Supplement: jmir_v10i4e42_app4.pdf [file jmir_v10i4e42_app4.pdf]

**Multimedia Appendix 4.** Importance of the Internet in various countries

|                 |               | 2005                    |                                        | 2007                    |                                        | Change                 |
|-----------------|---------------|-------------------------|----------------------------------------|-------------------------|----------------------------------------|------------------------|
|                 | 2005/2007 (N) | Mean % (CI)             | Internet compared to other media -Rank | Mean % (CI)             | Internet compared to other media -Rank | Mean Diff % (CI)       |
| <b>Germany</b>  | 974/1000      | <b>33.7 (30.8-36.7)</b> | 7                                      | <b>36.8 (33.9-39.7)</b> | 7                                      | <b>3.1 (-1.0-7.2)</b>  |
| <b>Denmark</b>  | 960/1021      | <b>46.0 (42.9-49.1)</b> | 3                                      | <b>54.4 (51.5-57.3)</b> | 2                                      | <b>8.4 (4.1-12.6)</b>  |
| <b>Greece</b>   | 1000/1000     | <b>37.5 (34.5-40.5)</b> | 8                                      | <b>42.6 (39.6-45.6)</b> | 8                                      | <b>5.1 (0.9-9.3)</b>   |
| <b>Portugal</b> | 2001/1000     | <b>51.5 (49.3-53.6)</b> | 7                                      | <b>55.9 (53.0-58.8)</b> | 7                                      | <b>4.4 (0.9-8.0)</b>   |
| <b>Poland</b>   | 1027/1000     | <b>41.4 (38.6-44.2)</b> | 7                                      | <b>48.2 (45.2-51.2)</b> | 6                                      | <b>6.8 (2.7-10.9)</b>  |
| <b>Latvia</b>   | 1000/1000     | <b>33.5 (30.7-36.3)</b> | 7                                      | <b>41.4 (38.6-44.2)</b> | 7                                      | <b>7.9 (3.9-11.9)</b>  |
| <b>Norway</b>   | 972/1001      | <b>38.4 (35.4-41.4)</b> | 6                                      | <b>48.4 (45.4-51.3)</b> | 4                                      | <b>10.0 (5.8-14.2)</b> |
