# Supplementary material for: eHealth Trends in Europe 2005-2007: A Population-Based Survey
Source: PubMed Central journal article supplement (PMC2629359; doi:10.2196/jmir.1023), 2008-11-17
Supplement: jmir_v10i4e42_app5.pdf [file jmir_v10i4e42_app5.pdf]

**Multimedia Appendix 5.** Expanded version of Table 3—Percentage of consumers who are using interactive Internet health services at least once a year

|                                                               | Internet Health user |                          |                | Internet user            |                          |               |
|---------------------------------------------------------------|----------------------|--------------------------|----------------|--------------------------|--------------------------|---------------|
|                                                               | 2005                 | 2007                     | Change         | 2005                     | 2007                     | Change        |
|                                                               | Mean % (CI)          | frequency<br>Mean % (CI) | Mean % (CI)    | frequency<br>Mean % (CI) | frequency<br>Mean % (CI) | Mean % (CI)   |
| Self-help activities                                          | 16.2 (15.4-17.0)     | 694<br>18.8 (17.9-19.7)  | 2.6 (1.4-3.8)  | 11.1 (10.3-11.8)         | 694<br>14.5 (13.7-15.3)  | 3.4 (2.3-4.5) |
| Order medicine or other health products                       | 11.7 (11.0-12.4)     | 596<br>15.0 ( 14.2-15.8) | 3.3 (2.2-4.4)  | 8.4 (7.8-9.0)            | 596<br>11.7 (11.0-12.4)  | 3.3 (2.3-4.3) |
| Interact with Web doctor/health professional you have not met | 18.7 (17.9-19.6)     | 780<br>22.6 (21.7-23.5)  | 3.9 (2.6-5.1)  | 13.2 (12.4-14.0)         | 780<br>16.8 (16.0-17.7)  | 3.6 (2.5-4.8) |
| Approach family doctor or other known health professional     | 7.3 (6.7- 7.8)       | 484<br>12.3 (11.6-13.1)  | 5.1 (4.1-6.0)  | 5.0 (4.5-5.6)            | 484<br>9.7 (9.0-10.4)    | 4.7 (3.8-5.5) |
| Using at least one of the interactive services above          | 34.9 (33.8-35.9)     | 1593<br>42.9 (41.8-44.0) | 8.0 (6.5-9.6 ) | 24.1 (23.1-25.0)         | 1593<br>32.3 (31.3-33.4) | 8.3 (6.8-9.7) |
