# Supplementary material for: eHealth Trends in Europe 2005-2007: A Population-Based Survey
Source: PubMed Central journal article supplement (PMC2629359; doi:10.2196/jmir.1023), 2008-11-17
Supplement: jmir_v10i4e42_app6.pdf [file jmir_v10i4e42_app6.pdf]

**Multimedia Appendix 6.** Total and estimated relative frequency of Internet health users and Internet users who are using at least one of the interactive services at least once a year

| Country         | All users         |                                      |                  | Internet health users |                                      |                   | Internet users   |                                      |                     |
|-----------------|-------------------|--------------------------------------|------------------|-----------------------|--------------------------------------|-------------------|------------------|--------------------------------------|---------------------|
|                 | 2005<br>% (CI)    | 2007<br>Observed frequency<br>% (CI) | Change<br>% (CI) | 2005<br>% (CI)        | 2007<br>Observed frequency<br>% (CI) | Change<br>% (CI)  | 2005<br>% (CI)   | 2007<br>Observed frequency<br>% (CI) | Change<br>% (CI)    |
| <b>Denmark</b>  | 21.2 18.6<br>23.7 | 335/1021<br>32.8 29.9<br>35.7        | 11.7 7.8 15.5    | 33.4 (30.5-36.4)      | 335/731<br>45.3 (42.2-48.4)          | 11.9 (7.6-16.2)   | 25.3 (22.6-28.1) | 335/889<br>36.8 (33.7-39.8)          | 11.4 (7.4-15.5)     |
| <b>Germany</b>  | 25.1 22.4<br>27.7 | 353/1000<br>35.3 32.4<br>38.2        | 10.2 6.3 14.2    | 54.6 (51.3-57.9)      | 353/566<br>63.0 (59.8-66.2)          | 8.4 (3.8-13.0)    | 38.6 (35.4-41.8) | 353/649<br>53.4 (50.0-56.7)          | 14.8<br>(10.2-19.4) |
| <b>Greece</b>   | 8.2 6.5 9.9       | 142/1000<br>14.2 12.1<br>16.3        | 6.0 3.4 8.7      | 34.0 (31.4-36.6)      | 142/321<br>48.3 (45.5-51.1)          | 14.3 (10.5- 18.2) | 21.3 (19.0-23.6) | 142/472<br>29.7 (26.9-32.4)          | 8.3 (4.8-11.9)      |
| <b>Latvia</b>   | 11.0 9.1<br>12.9  | 168/1000<br>16.8 14.5<br>19.1        | 5.8 2.8 8.8      | 25.1 (22.5-27.8)      | 168/470<br>31.7 (28.8-34.6)          | 6.5 (2.6-10.5)    | 16.2 (13.9-18.5) | 168/667<br>21.9 (19.3-24.5)          | 5.7 (2.2- 9.1)      |
| <b>Norway</b>   | 20.7 18.1<br>23.3 | 257/1001<br>25.7 22.9<br>28.5        | 5.0 1.2 8.8      | 35.0 (32.0-38.0)      | 257/669<br>38.5 (35.3-41.6)          | 3.5 (-0.9-7.9)    | 25.5 (22.7-28.2) | 257/880<br>28.3 (25.4-31.3)          | 2.9 (-1.2- 6.9)     |
| <b>Poland</b>   | 15.4 13.3<br>17.5 | 229/1000<br>22.9 20.4<br>25.4        | 7.5 4.2 10.8     | 41.3 (38.5-44.1)      | 229/533<br>42.2 (39.3-45.2)          | 1.0 (-3.1-5.1)    | 28.8 (26.0-31.5) | 229/667<br>32.7 (29.8-35.5)          | 3.9 ( -0.1- 7.8)    |
| <b>Portugal</b> | 5.3 4.3 6.3       | 109/1000<br>10.9 9.5<br>12.3         | 5.6 3.9 7.3      | 20.6 (18.8-22.4)      | 109/383<br>31.3 (29.3-33.4)          | 10.8 (8.0-13.5)   | 12.8 (11.3-14.2) | 109/523<br>23.7 (21.8-25.6)          | 10.9 ( 8.5-13.4)    |
